1 **IL-33 regulates gene expression in intestinal epithelial cells**  
2 **independently of its nuclear localization**

3

4 **Running title:** Transcriptional effects of IL-33 on IEC

5

6 **Zhengxiang He<sup>1</sup>, Lili Chen<sup>1</sup>, Glauca C. Furtado & Sergio A. Lira<sup>\*</sup>**

7

8 *Precision Immunology Institute, Icahn School of Medicine at Mount Sinai, New York,*

9 *10029, USA*

10

11 <sup>1</sup> Z.H. and L.C. contributed equally to this work.

12

13 **\* Address correspondence to:** Sergio A. Lira, M.D. Ph.D., 1425 Madison Ave, Box 1630

14 Room 12-20, New York, NY 10029. Phone (212) 659-9404; FAX (212) 849-2525; E-mail:

15 [sergio.lira@mssm.edu](mailto:sergio.lira@mssm.edu).

## 16 **Abstract**

17 IL-33 is a cytokine found in the extracellular space (mature IL-33) or in the cell nucleus  
18 (full-length IL-33). Nuclear accumulation of IL-33 has been reported in intestinal  
19 epithelial cells (IEC) during intestinal inflammation and cancer, but a functional role for  
20 this nuclear form remains unclear. To study the role of nuclear IL-33 in IEC, we  
21 generated transgenic mice expressing full-length IL-33 in the intestinal epithelium  
22 (*Vfl33* mice). Expression of full-length IL-33 in the epithelium resulted in accumulation  
23 of IL-33 protein in the nucleus and secretion of IL-33. Over-expression of full-length IL-  
24 33 by IEC did not promote gut inflammation, but induced expression of genes in the IEC  
25 and lamina propria lymphocytes (LPL) that correlated negatively with genes expressed  
26 in inflammatory bowel diseases (IBD). Because the IL-33 receptor ST2 is expressed by  
27 IEC, there was the potential that both the mature and full-length forms could mediate  
28 this effect. To specifically interrogate the transcriptional role of nuclear IL-33, we  
29 intercrossed the *Vfl33* mice with ST2- deficient mice. ST2 deficiency completely  
30 abrogated the transcriptional effects elicited by IL-33 expression, suggesting that the  
31 transcriptional effects of IL-33 on IEC are mediated by its mature, not its nuclear form.

32

## 33 **Key words**

34 IL-33; Intestinal Epithelial Cells; Inflammation; RNA-Seq

35

## 36 **Highlights**

- 37 • Expression of full-length IL-33 in the epithelium resulted in accumulation of IL-33  
38 protein in the nucleus and secretion of IL-33.
- 39 • Full-length IL-33 induced differential gene expression in IEC and LPL that was  
40 negatively associated with intestinal inflammatory diseases
- 41 • IL-33 regulated gene expression in IEC via its extracellular (mature) form not via its  
42 nuclear form.

43

#### 44 **Abbreviations**

45 IBD, inflammatory bowel diseases; IEC, intestinal epithelial cells; IL-33, Interleukin-33;  
46 ILC, innate lymphoid cells; LI, large intestine; LPL, lamina propria lymphocytes; q-PCR,  
47 reverse-transcription polymerase chain reaction; SI, small intestine; Th, T helper cells;  
48 WT, wild type.

49

## 50 **1. Introduction**

51 Interleukin-33 (IL-33), a member of the IL-1 family of cytokines(1), was originally  
52 described as a nuclear protein from human high endothelial venules (2). Subsequent  
53 studies showed that IL-33 acts as a cytokine, binding a heterodimeric receptor complex  
54 consisting of the ST2 receptor (ST2L) and the IL-1R accessory protein. The expression  
55 of this heterodimeric receptor has been detected on a variety of inflammatory cells(3,  
56 4), including eosinophils, basophils, macrophages, T helper 2 cells (Th2 cells),  
57 regulatory T cells, NK cells, B cells and group 2 innate lymphoid cells (ILC2)(5-7). IL-33  
58 plays a role in the host defense against infection and has been reported to be involved  
59 in the pathogenesis of a wide range of diseases (8).

60

61 In the gastrointestinal tract, IL-33 is normally expressed by stromal and immune cells,  
62 and IL-33 protein has been detected in the nuclei of such cells (9, 10). IL-33 is not  
63 normally expressed by epithelial cells, but recent evidence suggests that it can function  
64 as a novel epithelial “alarmin”(11), because it can be released as a danger signal by  
65 damaged, stressed, or necrotic cells to alert the immune system of a local threat.  
66 Epithelial expression of IL-33 has been reported in samples from patients with  
67 ulcerative colitis(9, 10, 12-15) and cancer(16).

68

69 IL-33 is believed to be a dual-function protein, functioning as conventional cytokine via  
70 its extracellular form (mature IL-33) or as a transcriptional regulator via its nuclear form  
71 (full-length IL-33). Although the molecular mechanism of release and processing of IL-

72 33 are not yet clear(17), it appears that the full-length IL-33 released from injured or  
73 necrotic cells is biologically active(11, 18-20), and this bioactivity can be transiently  
74 increased several-fold by limited proteolysis of the N-terminal domain (mature IL-33) in  
75 inflamed tissue(21, 22) before bioactivity is lost by destruction or oxidization of the C-  
76 terminal core tetrahedron structure(23). The N-terminal domain of full-length IL-33 is  
77 necessary for nuclear translocation, but it is unclear where it binds to the chromatin and  
78 whether it directly regulates gene expression in the intestinal epithelial cells (IEC). In  
79 this study, we investigate the biological properties of the full-length IL-33, focusing on  
80 its transcriptional properties.

## 81 2. Materials and methods

### 82 2.1 Mouse strains

83 C57BL/6 mice were purchased from The Jackson laboratory (Bar Harbor, ME).  $ST2^{-/-}$   
84 mice were generated in our laboratory as described by He et al(16). Mice were  
85 maintained under specific pathogen-free conditions. All experiments involving animals  
86 were performed following guidelines of the Animal Care and Use Committee of the  
87 Icahn School of Medicine at Mount Sinai.

88

### 89 2.2 Generation of transgenic mice expressing IL-33 in the intestinal epithelium

90 The cDNA of IL-33 full-length form was cloned into a pBS-Villin vector that contained a  
91 9kb segment of the mouse villin promoter(24). The pBS-Villin/IL-33 plasmid was  
92 verified by sequencing, and the transgene was isolated from the plasmid by restriction  
93 enzyme digestion and gel purification. To generate transgenic mice, the transgene was  
94 microinjected into C57BL/6 mouse eggs. Identification of the transgenic *Vfl33* mice was  
95 done by PCR amplification using the following primers: 5'- ggctgtgatagcacacagga-3'  
96 and 5'- ttcgctgctgctgctgaac -3'.

97

### 98 2.3 Enzyme-linked immunosorbent assay

99 Small pieces of small intestine or colon (5 mm of mid-part) were isolated, rinsed in PBS,  
100 weighed, and cultured overnight in 12-well tissue culture plates (Costar) in 1000  $\mu$ l  
101 complete DMEM at 37°C in an atmosphere containing 5% CO<sub>2</sub>. After centrifugation to  
102 pellet debris, culture supernatants were transferred to fresh tubes and stored at -80°C.

103 IL-33 was quantified in the supernatant of intestinal explant cultures from *Vfl33* and WT  
104 mice by enzyme-linked immunosorbent assay (ELISA) according to standard  
105 manufacturer's recommendations (eBioscience) and the results were normalized to the  
106 weight of the intestinal explant.

107

#### 108 *2.4 Reverse-transcription polymerase chain reaction*

109 Total RNA from tissues cells was extracted using the RNeasy mini Kit (Qiagen)  
110 according to the manufacturer's instructions. Complementary DNA (cDNA) was  
111 generated with Superscript III (Invitrogen). Quantitative PCR was performed using  
112 SYBR Green Dye (Roche) on the 7500 Real Time System (Applied Biosystems) machine.  
113 Thermal cycling conditions used were as follows: 50 °C for 2min and 95 °C for 10 min,  
114 40 cycles of 95 °C for 15 s, 60 °C for 1min, followed by dissociation stage. Results were  
115 normalized to the housekeeping gene Ubiquitin. Relative expression levels were  
116 calculated as  $2^{(Ct(\text{Ubiquitin})-Ct(25))}$ . Primers were designed using Primer3Plus software(26).

117

#### 118 *2.5 Histology and immunofluorescence staining*

119 Tissues were dissected, fixed in 10% phosphate-buffered formalin, and then processed  
120 for paraffin sections. Five-micrometer sections were stained with hematoxylin and  
121 eosin (H&E) for histological analyses. For immunofluorescence staining, five-  
122 micrometer sections were dewaxed by immersion in xylene (twice for 5 minutes each  
123 time) and hydrated by serial immersion in 100%, 90%, 80%, and 70% ethanol and PBS.  
124 Antigen retrieval was performed by microwaving sections for 20 minutes in Target

125 Retrieval Solution (DAKO). Sections were washed with PBS (twice for 10 minutes each  
126 time), and blocking buffer (10% BSA in TBS) was added for 1 hour. Sections were  
127 incubated with primary antibody in blocking buffer overnight at 4°C. After washing,  
128 conjugated secondary Abs were added and then incubated for 35 min. Cell nuclei were  
129 stained using 4',6-Diamidino-2-Phenylindole (DAPI). The slides were next washed and  
130 mounted with Fluoromount-G (Southern Biotech). Images were captured using a Nikon  
131 fluorescence microscope. Colocalization was performed with ImageJ and the  
132 colocalization finder plug-in.

133

#### 134 *2.6 Western blot analysis*

135 Intestine were opened longitudinally and thoroughly washed in PBS and then  
136 homogenized in ice-cold lysis buffer (100 mM Tris-HCl, pH 6.8, 4% SDS, 20% glycerol,  
137 200 mM  $\beta$ -mercaptoethanol, 1 mM phenylmethylsulfonyl fluoride and 1  $\mu$ g/mL  
138 aprotinin). Lysates were then centrifuged at 12 000g for 15 min to remove insoluble cell  
139 debris. Protein content was quantified using the Bio-Rad protein assay (Bio-Rad) and 15  
140  $\mu$ g of protein was separated by SDS-PAGE and transferred onto polyvinylidene  
141 difluoride membranes. The membrane was blocked for 1 h in buffer (TBS, 5% milk, 0.1%  
142 Tween 20) and then incubated with the primary antibody (Rat Anti-Mouse IL-33  
143 Monoclonal Antibody) (Catalog # MAB3626, R&D Systems) in dilution buffer (TBS, 5%  
144 bovine serum albumin, 0.1% Tween 20) overnight at 4 °C. The membrane was then  
145 washed three times with wash buffer (TBS, 0.1% Tween 20), incubated with Rat IgG



146 HRP-conjugated Antibody (Catalog # HAF005, R&D Systems) and visualized with the  
147 enhanced chemiluminescent detection system (Amersham Biosciences).

148

#### 149 *2.7 Isolation of IEC and LPL*

150 Intestines were opened longitudinally and thoroughly washed in PBS. The intestine was  
151 then incubated in 30 ml PBS containing 1 mM dithiothreitol (DTT) on room temperature  
152 for 15 min. The intestine was then removed and briefly washed in PBS and incubated in  
153 25 ml PBS containing 5.2mM ethylenediaminetetraacetic acid (EDTA) at 4 °C at 200  
154 RPM for 30 min. The cells were then subjected to 30 sec vigorous shaking and the tissue  
155 removed. The cells were then centrifuged at 1000 g for 5 min at 4 °C, washed in PBS  
156 containing 10% FBS and spun for a further 5 min at 4 °C at 1000 g. These cells  
157 constituted the IEC population. To isolate lamina propria lymphocytes (LPL), the  
158 remaining tissues were performed as described before(16).

159

#### 160 *2.8 Cell sorting*

161 Cell pellets were first pre-incubated with anti-mouse CD16/CD32 for blockade of Fc  $\gamma$   
162 receptors, then were washed and incubated for 30 min with fluorescent conjugated  
163 antibodies against CD45 and EpCAM in a total volume of 500  $\mu$ l PBS containing 2 mM  
164 EDTA and 2% (vol/vol) fetal bovine serum. DAPI (Invitrogen) was used to distinguish  
165 live cells from dead cells during cell sorting. Stained IECs (DAPI<sup>-</sup>CD45<sup>-</sup>Epcam<sup>+</sup>) and LPL  
166 (DAPI<sup>-</sup>CD45<sup>+</sup>) were purified with a MoFlo Astrios cell sorter (DakoCytomation). Cells  
167 were > 95% pure after sorting.

168

169 *2.9 Microarray analysis.*

170 Total RNA from the sorted intestinal CD45<sup>+</sup> cells from WT and *Vfl33* mice was extract  
171 using RNeasy Micro Kit (Qiagen). Microarrays were done and analyzed as described  
172 before(27, 28). In order to analyses the pathways that the differentially expressed genes  
173 are involved in, KEGG pathway enrichment analyses were performed using ClueGo(29,  
174 30). A cut-off of 0.4 was set for kappa score and terms including at least 3 genes were  
175 retrieved.

176

177 *2.10 RNA-seq*

178 Following cell sorting into Trizol LS reagent, samples were shipped on dry ice to the  
179 Center for Functional Genomics and the Microarray & HT Sequencing Core Facility at  
180 the University at Albany (Rensselaer). Total RNA from sorted cells ( $3 - 9 \times 10^5$  cells) was  
181 extracted using the RNeasy micro Kit (Qiagen) with an on-column DNase digestion  
182 step included according to the manufacturer's instructions. RNA quality was assessed  
183 using the Nanodrop (Thermo Scientific) and Bioanalyzer Total RNA Pico assay  
184 (Agilent). Total RNA with a RNA integrity number (RIN) value of 7 or greater was  
185 deemed of good quality to perform the subsequent protocols. 100 pg of total RNA was  
186 oligo-dT primed using the SMART-Seq v4 Ultra Low Input RNA Kit (Clontech) and  
187 resulting the cDNA was amplified using 15 cycles of PCR. The double stranded cDNA  
188 (dscDNA) was purified using AMPure XP magnetic beads and assessed for quality using  
189 the Qubit dsDNA HS assay and an Agilent Bioanalyzer high sensitivity dscDNA chip

190 (expected size ~600bp-9000bp). The Illumina Nextera XT kit was used for library  
191 preparation wherein 125 pg dsDNA was fragmented and adaptor sequences added to  
192 the ends of fragments following which 12 cycles of PCR amplification was performed.  
193 The DNA library was purified using AMPure XP magnetic beads and final library  
194 assessed using Qubit dsDNA HS assay for concentration and an Agilent Bioanalyzer  
195 high sensitivity DNA assay for size (expected range ~600-740bp). Library quantitation  
196 was also done using a NEBNext Library Quant kit for Illumina. Each library was then  
197 diluted to 4nM, pooled and denatured as per standard Illumina protocols to generate a  
198 denatured 20 pM pool. A single end 75bp sequencing was performed on the Illumina  
199 Nextseq 500 by loading 1.8 pM library with 5% PhiX on to a 75 cycle high output flow  
200 cell. The RNAseq data was checked for quality using the Illumina FastQC algorithm on  
201 Basespace.

202

### 203 *2.11 Transcriptome analysis*

204 RNA-Seq data from IECs was mapped to the mouse reference genome (UCSC/mm10)  
205 using Tophat version 2.1.0(31). Gene-level sequence counts were extracted for all  
206 annotated protein-coding genes using htseq-count version 0.6.1 (32) by taking the strict  
207 intersection between reads and the transcript models associated with each gene. Raw  
208 count data were filtered to remove low expressed genes with less than five counts in  
209 any sample. Differentially expressed genes between groups were analyzed using  
210 Bioconductor EdgeR package version 3.10.2 Bioconductor/R(33, 34). Statistically  
211 significant differentially expressed genes between groups ( $Q < 0.05$ ) were selected in

212 gene-wise log-likelihood ratio tests that were corrected for multiple testing by  
213 Benjamini and Hochberg FDR.

214

215 *2.12 NextBio*

216 Meta-analysis was conducted by NextBio ([www.nextbio.com](http://www.nextbio.com)) (35). The gene list (*Vfl33*  
217 vs WT) from LPL Microarray results and IEC RNA-seq results were used as input to  
218 query a collection of individual biosets in NextBio database. The NextBio application  
219 “disease atlas” was used. The association score based on statistical significance across  
220 different diseases (100 to the most significant inside the diseases).

221

222 *2.13 Statistics*

223 Differences between groups were analyzed with nonparametric Mann-Whitney test.  
224 For the comparison of more than two groups a one-way ANOVA followed by a  
225 Bonferroni multiple comparison tests were performed. All statistical analyses were  
226 performed using GraphPad Prism 5 software.

227

## 228 **3. Results**

### 229 *3.1 Generation of transgenic mice expressing nuclear IL-33 in the epithelium*

230 To investigate the function of full-length IL-33 in epithelial cells, we cloned the cDNA  
231 encoding the full-length form of IL-33 downstream of the villin promoter (Fig. 1A). The  
232 transgene was injected into mouse eggs and 3 transgenic lines were derived. These  
233 animals are referred to as *Vfl33* mice (Fig. 1A). The *Vfl33* mice were healthy and  
234 reproduced normally. To examine IL-33 expression and select a line for further studies,  
235 we extracted RNA from the small and large intestine of control and transgenic mice. As  
236 expected, we detected increased expression of IL-33 mRNA in the small intestine and  
237 large intestine in the *Vfl33* transgenic mice compared with their littermate control WT  
238 mice (Fig. 1B). To examine expression of IL-33 protein, we performed ELISA in the gut  
239 extracts and found that IL-33 production in the supernatant was elevated in the  
240 intestine of transgenic mice compared to WT mice (Fig. 1C). Finally, we examined the  
241 cellular expression of IL-33. Because we expressed the full-length form of IL-33, we  
242 expected that it should be located in the nucleus rather than the cytoplasm.  
243 Immunostaining of intestinal sections showed that IL-33 immunoreactivity was indeed  
244 detected in the nucleus of transgenic, but not control intestinal epithelial cells (Fig. 1D).  
245 Similar qualitative results were obtained by analysis of animals in the 3 transgenic lines  
246 and line 2 was selected for further analysis.

247

248 Although the molecular mechanism of release and processing of IL-33 are not yet  
249 clear(17), the studies done so far show that the full-length IL-33 released from injured or

250 necrotic cells is biologically active(11, 18-20), and that its bioactivity can be transiently  
251 increased several-fold by limited proteolysis of the N-terminal domain (mature-IL-33) in  
252 the tissue(21, 22). We next examined whether mature IL-33 could be detected in the  
253 intestine of *Vfl33* mice. To do so, we performed Western blot to analyze the different  
254 molecular species of IL-33 in the intestine. We found that the predominant form of IL-33  
255 in the extracts was the full-length form (37kD band), but that a 18kD (mature IL-33) was  
256 also present (Fig. 1E). Together the results indicate that the transgenic IL-33 was  
257 correctly targeted to IEC of both small and large intestine, and that it accumulated in  
258 the nucleus. In addition they suggest that the processed IL-33 mature form was also  
259 produced, although at lower concentration.

260

261

### 262 *3.2 Over-expression of full-length IL-33 by IEC does not promote intestinal inflammation*

263 To examine the potential impact of epithelial-specific IL-33 on the intestinal  
264 inflammation, we performed histological analysis of the gut in *Vfl33* mice. We found  
265 that there was no inflammation in the gut of transgenic mice (Fig. 2A). Consistent with  
266 this, FACS analysis of LPL showed that there were no differences in the total number of  
267 CD45<sup>+</sup> cells between *Vfl33* and WT mice (Fig. 2B). The results suggested that over-  
268 expression of full-length IL-33 by IEC did not promote gut inflammation.

269

270

### 271 *3.3 Epithelial-derived IL-33 triggers gene expression in lamina propria leukocytes*

272 To examine if IL-33 expression affected intestinal immune cells, we sorted lamina  
273 propria CD45<sup>+</sup> cells from both groups to perform microarray analysis. The results show  
274 that 105 genes were upregulated and 58 genes were downregulated in *Vfl33* mice  
275 compared to WT mice (Fig. 3A & 3B). It has been reported that IL-33 can enhance the  
276 primary differentiation of CD4<sup>+</sup> Th1, Th2, and Treg (36). We found that expression of  
277 full-length IL-33 was associated with increased Th2 immune response in the gut,  
278 consistent with a signature of up-regulated Th2 transcription factor (*Gata3*) and Th2  
279 cytokines (*Il4* and *Il13*) by quantitative PCR (q-PCR) (Fig. 3C). In addition, expression of  
280 *retnla* and *retnlb*, which are induced in Th2 environment(37), was also up-regulated in  
281 the gut of *Vfl33* mice (Fig. 3C).

282

283 Pathway analysis of differentially expressed mRNAs is designed to provide insight into  
284 the cell pathways associated with these genes. Pathway analysis of 163 differential  
285 expressed genes in CD45<sup>+</sup> cells of *Vfl33* mice showed that “inflammatory bowel disease”  
286 was the top pathway (Fig. 3D), suggesting that epithelium expressed IL-33 could have a  
287 role in the IBD. In addition, we used the gene list (*Vfl33* vs WT) from the LPL microarray  
288 as input to query a collection of individual biosets in NextBio database. The NextBio  
289 application “disease atlas”, which focuses on digestive system disease, was used for  
290 analysis. We found that differentially expressed *Vfl33* genes negatively correlated with  
291 genes expressed in inflammatory bowel disease, Crohn’s disease, enteritis of small  
292 intestine and colitis (Fig. 3E). Together, the pathway analyses and the NextBio meta-  
293 analysis suggest that epithelium-derived IL-33 regulates gene expression, and that

294 many of these differentially expressed genes negatively correlate with genes expressed  
295 in IBD.

296

297

### 298 *3.4 Full-length IL-33 regulates gene expression in the epithelium*

299 To investigate the function of IL-33 in the epithelium, we sorted intestinal epithelial  
300 cells from *Vfl33* mice and WT mice, extracted mRNA and performed RNA sequencing.

301 The results showed that 103 genes were upregulated and 52 genes were downregulated  
302 in transgenic IEC compared to controls (Fig. 4A). Since the IL-33 regulated genes in the

303 lamina propria leukocytes were associated with IBD, we asked next if the differentially  
304 expressed genes of the intestinal epithelial cells also correlated with IBD. To do so we

305 filtered the differentially expressed genes in the IEC RNA-seq results using the disease  
306 category locator of the NextBio software. The results indicated that the differentially

307 expressed genes shared high similarity with genes associated with digestive system  
308 disease (Fig. 4B). Notably, differentially expressed genes were negatively correlated

309 with intestinal inflammatory diseases such as enteritis of small intestine, IBD, colitis  
310 and Crohn's disease (Fig. 4B). Taken together, the transcriptomic analyses of both

311 epithelial cells and leukocytes suggest a protective role of epithelial-derived IL-33 in  
312 intestinal inflammation.

313

314

### 315 *3.5 IL-33-induced gene regulation in IEC is not dependent on its nuclear localization*



316 IL-33 is hypothesized to be a dual-function protein, functioning as a conventional  
317 cytokine and/or as a transcriptional regulator. To investigate if the nuclear form of IL-33  
318 directly regulated transcription, we expressed the IL-33 full-length form and  
319 simultaneously deleted expression of its receptor ST2. To do so, we crossed IL-33  
320 transgenic mice (*Vfl33*) with ST2 deficient mice (*ST2*<sup>-/-</sup>)<sup>(16)</sup> to generate *Vfl33 ST2*<sup>-/-</sup> mice.  
321 First, we confirmed that shutdown the IL-33/ST2 signaling did not change the nuclear  
322 location of full-length IL33 in *Vfl33 ST2*<sup>-/-</sup> mice (Fig. 5A). We then sorted IEC from WT,  
323 *Vfl33*, *ST2*<sup>-/-</sup> and *Vfl33 ST2*<sup>-/-</sup> mice, extracted RNA and performed RNA-seq. To our  
324 surprise, WT, *ST2*<sup>-/-</sup> and *Vfl33 ST2*<sup>-/-</sup> clustered together, and apart from *Vfl33* by principal  
325 component analysis (Fig. 5B). Further analysis shown that with exception of IL-33, there  
326 were no differences in gene expression between IEC from *Vfl33 ST2*<sup>-/-</sup> and those from  
327 WT mice (Fig. 5C). In addition, there were no differences in gene expression between  
328 IEC of WT and *ST2*<sup>-/-</sup> mice (Fig. 5B). As shown in Fig. 5D, none of the differentially  
329 expressed genes between *Vfl33* and WT mice were differentially expressed in *Vfl33 ST2*<sup>-/-</sup>  
330 <sup>-/-</sup> mice. Thus, the RNA-seq analyses do not support a role of nuclear IL-33 in the  
331 regulation of gene expression in the IEC. All together, the results suggested that IL-33  
332 regulates gene expression in the epithelium via its interaction with epithelial-expressed  
333 ST2.

334

335

#### 336 4. Discussion

337

338 IL-33 has been detected in the nucleus of epithelial cells in intestinal inflammation and  
339 cancer, but whether this nuclear form of IL-33 contributes to transcriptional regulation,  
340 is a matter of debate. In this study, we generated transgenic mice to investigate the  
341 role of IL-33 on IEC (Fig. 1). We found that the bulk of the IL-33 protein present in  
342 intestinal extracts of these animals corresponded to the full-length form, but also  
343 detected the mature, processed form. Immunostaining experiments documented the  
344 nuclear accumulation of IL-33 in the IEC. Comparison of gene expression profiles of  
345 sorted IEC from WT and *Vfl33* mice showed a marked difference, clearly supporting a  
346 role for IL-33 in regulating IEC gene expression (Fig. 3A). The precise effect of epithelial-  
347 derived IL-33 to the gut inflammatory conditions has remained unclear. Experimental  
348 data obtained using different animal models of intestinal inflammation have produced  
349 conflicting results(38, 39), with IL-33 having both pro-inflammatory and anti-  
350 inflammatory effects. Previous studies done by our group have shown that expression  
351 of mature IL-33 by IEC does not promote gut inflammation(16), suggesting that  
352 epithelium derived mature IL-33 does not display pro-inflammatory properties. In line  
353 with this observation, over-expression of full-length IL-33 by IEC reported here also  
354 does not promote gut inflammation (Fig. 2). Meta-analysis of genes differentially  
355 expressed in *Vfl33* mice in the IEC negatively correlated with intestinal inflammatory  
356 diseases such as enteritis of small intestine, IBD, colitis and Crohn's disease (Fig. 4),  
357 suggesting a protective role of epithelial-derived IL-33 in the intestinal inflammation.

358

359 We suggest that the expression of IL-33 by IEC, contributes a protective effect on the  
360 acute inflammation that ensues from damage of the gut epithelium. Therefore, IL-33  
361 production may serve as a counterregulatory response to inflammation. The protective  
362 effects could derive from a direct cytokine role of IL-33 on IEC, leading to expression of  
363 genes that are negatively associated with inflammation as described above. This  
364 protective ability may not be only related to the effects of IL-33 signaling on IEC.  
365 Release of the mature IL-33 could also affect immune cells. Indeed, our microarray  
366 analyses indicate that epithelium-derived IL-33 differentially regulated expression of  
367 several genes in lamina propria leukocytes. One of the most upregulated genes in  
368 lamina propria leukocytes was the IL-33 receptor ST2. Previous work from our lab has  
369 shown that epithelial-derived IL-33 induces expansion of ST2<sup>+</sup> Treg cells in the  
370 intestine(16). Tregs induced by IL-33 signaling could ameliorate inflammation(40).  
371 Other genes to prominently expressed by the *Vfl33* leukocytes were those involved in  
372 the Th2 response in the gut (Fig. 3). Indeed, induction of Th2 responses may be of  
373 benefit when mucosal inflammation is mediated through Th1 or Th17 pathways(41).  
374 These results add to the clinical evidence that administration of helminths as a  
375 therapeutic option in IBD, as helminths may exert their anti-inflammatory effect  
376 through the induction of specific Th2 cytokines(42, 43). Epithelial-derived IL-33 could  
377 directly act on Th17 cells to help them to acquire immunosuppressive phenotype(44). In  
378 addition, IL-33 induced M2 macrophages has been reported in the contribution of  
379 attenuation of colitis(45, 46). Th2 cytokines also appear to influence resolution of  
380 inflammation by inducing polarization of macrophages to M2 macrophages (45). Finally,

381 the genes regulated in lamina propria leukocytes by IL-33 negatively correlated with  
382 genes associated with intestinal inflammatory diseases (Fig. 3).

383

384 Most of the studies on the function of the nuclear function of IL-33 have been  
385 performed in endothelial cells(47). It has been shown that nuclear IL-33 can bind to the  
386 acidic pocket formed by histones H2A and H2B (48, 49), and to bind to the  
387 transcriptional repressor histone methyltransferase (50), but it is unclear if this physical  
388 association has functional properties. Some studies have reported that IL-33 can affect  
389 nuclear factor-kB (NF-kB) activity in a gene dependent manner. Binding of IL-33 to the  
390 NF-kB p65 subunit in the nucleus reduces p65-triggered gene expression to dampen the  
391 production of proinflammatory cytokines(51). However, others have reported that  
392 nuclear IL-33 could bind to the promoter region of p65, positively regulating its  
393 transcriptional activity in endothelial cells(52). Thus, while there is evidence for binding  
394 of IL-33 to nuclear proteins in endothelial cells, its ability to regulate gene transcription  
395 remains controversial.

396

397 Here we provide direct evidence that IL-33 can regulate gene expression in the  
398 epithelium. Under these conditions IL-33 could affect gene regulation by acting directly  
399 in the nucleus, or by autocrine regulation via ST2, which is expressed by epithelial  
400 cells(14), or both. To discriminate among these possibilities, we forced IL-33 expression  
401 in epithelial cells and ablated expression of ST2 in all cells, including epithelial cells.  
402 Surprisingly, the only gene to be upregulated in these IEC in these conditions was the

403 transgenic full-length, nuclear form of IL-33. The results indicate that IL-33 induced  
404 transcriptional changes via autocrine activation of ST2 and suggest that there are no  
405 transcriptional activities associated with its nuclear form in IEC (Fig. 5). We cannot  
406 formally rule out that the nuclear form of IL-33 controls microRNA transcription,  
407 because our methods for RNA preparation did not enrich for microRNAs. The impact of  
408 any increased miRNA expression, however, would be in the levels of mRNA transcripts,  
409 but no changes were detected when the transcriptomes of WT and *Vfl33 ST2<sup>-/-</sup>* IEC were  
410 compared. We would thus posit that there are no transcriptional activities associated  
411 with the nuclear form of IL-33 in IEC. Our transcriptional studies in IEC corroborate  
412 proteomic studies done by Girard's group using endothelial cells(53). Using RNA  
413 silencing strategies they showed that in endothelial cells IL-33 acts as a cytokine, not as  
414 a nuclear factor, regulating gene expression (53). The actual function of the nuclear  
415 form may be related to control the availability of the mature form in circulation.  
416 Elegant studies done by Bessa et al. (54) show that in the absence of nuclear  
417 localization, IL-33 is released into the circulation leading to widespread non-resolving  
418 inflammation that culminates in the death of the animal(54). Therefore, the main  
419 purpose of IL-33 nuclear localization and chromatin association may be the regulation  
420 of its potent extracellular (mature IL-33) cytokine activity(53), not control of  
421 transcription, as demonstrated here.

422

## 423 **5. Conclusion**

424 In summary, expression of full-length IL-33 in the epithelium resulted in accumulation  
425 of IL-33 protein in the nucleus and secretion of IL-33. Accordingly, expression of full-  
426 length IL-33 in the epithelium promoted expression of genes in the neighboring lamina  
427 propria leukocytes and in epithelial cells. The gene program activated by IL-33 in these  
428 cells suggests that this molecule has a role in resolution of the inflammatory response.  
429 The transcriptional program elicited by expression of full length IL-33 was promoted by  
430 its mature, processed, form via binding to its receptor ST<sub>2</sub>, not by its nuclear form in  
431 intestinal epithelial cells.

432

433

434 **Author contributions**

435

436 L.C. and Z.H. designed study, did experiments, analyzed data and wrote the manuscript;

437 G.C.F and S.A.L designed study, analyzed data and wrote the manuscript. All authors

438 reviewed the manuscript.

439

440 **Conflict of interest**

441 The authors declare no competing financial interests.

442

443 **Grant Support**

444 This work was supported in part by the SUCCESS (Sinai Ulcerative Colitis Clinical,

445 Experimental and System Studies) grant from the Bacchetta Foundation. Funds for the

446 generation of the *Vfl33* mice were provided by Janssen Pharmaceuticals. Lili Chen

447 received a Research Fellowship Award (327362) from the Crohn's & Colitis Foundation

448 of America (CCFA).

449

450 **Acknowledgments**

451 We thank all members of the Lira Lab for their support. We thank Claudia Canasto-

452 Chibuque for colony maintenance, Chao Yang for Western Blot and Dr. Kevin Kelley

453 and the Mouse Genetics Shared Research Facility for assistance in generation of

454 transgenic mice.

455 **Figure legends**

456 **Fig. 1 Generation of transgenic mice expressing full-length IL-33 in the gut**

457 **epithelium.** (A) Scheme for generation of *Vfl33* mice. A transgene encoding the IL-33

458 full-length form under the control of the murine villin promoter (gkb) was used to

459 generate *Vfl33* mice. (B) Relative expression levels of IL-33 mRNA were analyzed by

460 qPCR in the small intestine (SI) and colon of wild-type (WT) and *Vfl33* mice. Data were

461 normalized to the expression levels of the Ubiquitin transcript. Means  $\pm$  s.e.m., n = 6 per

462 group. \*\*\*P < 0.001, one-way ANOVA. (C) Enzyme linked immunosorbent assay of IL-

463 33 in the gut explants from WT and *Vfl33* mice. Data were normalized to the weight of

464 the intestine explant. Means  $\pm$  s.e.m., n = 4 per group. \*\*\*P < 0.001, one-way ANOVA.

465 (D) Immunofluorescence staining for IL-33 (red) in the gut of WT and *Vfl33* mice. Notice

466 that transgenic expression of IL-33 in the nucleus of intestinal epithelial cells (IEC) in

467 *Vfl33* mice. IEC stained with an anti-Epcam antibody (green). Scale bars, 50 $\mu$ m. Inset

468 shows higher magnification of the boxed area. (E) Western blot analysis of IL-33

469 expression in the gut of WT and *Vfl33* mice. The GAPDH protein levels were used as

470 protein loading controls. The expected molecular sizes for the full-length and mature

471 forms of IL-33 are 37 and 18 kDa, respectively.

472

473

474 **Fig. 2 Over-expression of full-length IL-33 by IEC does not promote gut**

475 **inflammation.** (A) Representative H&E-stained intestinal sections of *Vfl33* mice. Scale

476 bars, 50  $\mu$ m. (B) Total CD45<sup>+</sup> cells in the gut of *Vfl33* and WT mice (n=6 mice/group). N.s.,

477 non significant; by Mann-Whitney test.



478

479 **Fig. 3 Epithelial-derived IL-33 triggers gene expression in lamina propria leukocytes.**

480 (A-B) Leukocytes (CD45<sup>+</sup>) isolated from *Vfl33* and WT LPL were analyzed by microarray  
481 (n= 4-5/group). (A) Quantile-normalized expression values were analyzed using a paired  
482 design and filtered for  $Q < 0.05$  and  $-1.2 > \text{fold change} > 1.2$ . Z score-normalized data  
483 were subjected to hierarchical clustering. (B) Plot of logFC (log fold change) versus  
484 mean expression of all detected transcripts (gray) and significant genes (red). (C)  
485 Quantitative PCR analysis of the selected Th2 immune response associated genes in  
486 the gut of *Vfl33* and WT mice (n= 5-7/group). Data were normalized to the expression  
487 levels of the Ubiquitin transcript. Means  $\pm$  s.e.m., \*P < 0.05, \*\*P < 0.01, Mann-Whitney  
488 test. (D) The pathway enriched among total 163 differential expressed genes in the  
489 *Vfl33* versus WT LPL by KEGG analysis. (E) The mRNA expression profile of *Vfl33* LPL vs  
490 WT LPL correlated with various digestive system diseases by using NextBio meta-  
491 analysis program. The correlated diseases are shown with the corresponding significant  
492 scores as well as the number of biosets within each disease. Columns are colored  
493 according to correlation with query: positive correlation (red) and negative correlation  
494 (blue).

495

496 **Fig. 4 Differential expression of epithelial genes triggered by IL-33 correlates with a**

497 **subset of genes involved in diseases of the digestive system.** (A) *Vfl33* and WT IEC  
498 were analyzed by RNA-Seq/edgeR using a paired design (n = 3-4/group). Plot of logFC  
499 (log fold change) versus logCPM (log counts per million) of all detected transcripts.

500 Points are colored according to expression status: non-significant genes (gray) and  
501 significant genes (155 genes;  $Q < 0.05$  and  $-2 > \text{fold change} > 2$ ; red). (B) NextBio meta-  
502 analysis showed that the mRNA expression profile of *Vfl33* IEC vs WT IEC negatively  
503 correlated with various digestive system diseases. The correlated diseases are shown  
504 with the corresponding significant scores as well as the number of biosets within each  
505 disease. Columns are colored according to correlation with query: positive correlation  
506 (red) and negative correlation (blue).

507

508 **Fig. 5 Genetic deletion of *ST2* in *Vfl33* mice abrogates IL-33 induced gene expression**

509 **in IEC.** (A) Immunofluorescence staining for IL-33 (red) in the intestine of *Vfl33 ST2<sup>-/-</sup>*  
510 mice. Scale bars, 50  $\mu\text{m}$ . (B) Principal component analysis of RNA-seq expression data  
511 from all biological replicates of IEC from WT, *Vfl33*, *ST2<sup>-/-</sup>* and *Vfl33 ST2<sup>-/-</sup>* ( $n = 3-4/\text{group}$ ).  
512 (C) *Vfl33 ST2<sup>-/-</sup>* and WT IEC were analyzed by RNA-Seq/edgeR using a paired design ( $n =$   
513  $3-4/\text{group}$ ). Plot of logFC (log fold change) versus logCPM (log counts per million) of all  
514 detected transcripts. Points are colored according to expression status: non-significant  
515 genes (gray) and significant gene (*Il33* gene;  $Q < 0.05$ ; red). (D) Heat map depiction of  
516 all differentially expressed genes between WT and *Vfl33* in all groups (WT, *Vfl33*, *ST2<sup>-/-</sup>*  
517 and *Vfl33 ST2<sup>-/-</sup>*). Red indicates increased and green indicates decreased expression in  
518 *Vfl33* IEC compared with WT IEC.

519

520

## 521 References

522

523

1. Schmitz, J., A. Owyang, E. Oldham, Y. L. Song, E. Murphy, T. K. McClanahan, G. Zurawski, M. Moshrefi, J. Z. Qin, X. X. Li, D. M. Gorman, J. F. Bazan, and R. A. Kastelein. 2005. IL-33, an interleukin-1-like cytokine that signals via the IL-1 receptor-related protein ST2 and induces T helper type 2-associated cytokines. *Immunity* 23: 479-490.

527

528

529

530

2. Baekkevold, E. S., M. Roussigne, T. Yamanaka, F. E. Johansen, F. L. Jahnsen, F. Amalric, P. Brandtzaeg, M. Erard, G. Haraldsen, and J. P. Girard. 2003. Molecular characterization of NF-HEV, a nuclear factor preferentially expressed in human high endothelial venules. *The American journal of pathology* 163: 69-79.

531

532

533

3. Chackerian, A. A., E. R. Oldham, E. E. Murphy, J. Schmitz, S. Pflanz, and R. A. Kastelein. 2007. IL-1 receptor accessory protein and ST2 comprise the IL-33 receptor complex. *Journal of immunology* 179: 2551-2555.

534

535

536

4. Greenfeder, S. A., P. Nunes, L. Kwee, M. Labow, R. A. Chizzonite, and G. Ju. 1995. Molecular cloning and characterization of a second subunit of the interleukin 1 receptor complex. *The Journal of biological chemistry* 270: 13757-13765.

537

538

5. Ohno, T., H. Morita, K. Arae, K. Matsumoto, and S. Nakae. 2012. Interleukin-33 in allergy. *Allergy* 67: 1203-1214.

539

540

6. Mirchandani, A. S., R. J. Salmond, and F. Y. Liew. 2012. Interleukin-33 and the function of innate lymphoid cells. *Trends in immunology* 33: 389-396.

541

542

7. Lu, J., J. Kang, C. Zhang, and X. Zhang. 2015. The role of IL-33/ST2L signals in the immune cells. *Immunol Lett* 164: 11-17.

543

544

8. Liew, F. Y., N. I. Pitman, and I. B. McInnes. 2010. Disease-associated functions of IL-33: the new kid in the IL-1 family. *Nature reviews. Immunology* 10: 103-110.

545

546

547

548

9. Pastorelli, L., R. R. Garg, S. B. Hoang, L. Spina, B. Mattioli, M. Scarpa, C. Fiocchi, M. Vecchi, and T. T. Pizarro. 2010. Epithelial-derived IL-33 and its receptor ST2 are dysregulated in ulcerative colitis and in experimental Th1/Th2 driven enteritis. *P Natl Acad Sci USA* 107: 8017-8022.

- 549 10. Seidelin, J. B., J. T. Bjerrum, M. Coskun, B. Widjaya, B. Vainer, and O. H. Nielsen. 2010.  
550 IL-33 is upregulated in colonocytes of ulcerative colitis. *Immunol Lett* 128: 80-85.
- 551 11. Luthi, A. U., S. P. Cullen, E. A. McNeela, P. J. Duriez, I. S. Afonina, C. Sheridan, G.  
552 Brumatti, R. C. Taylor, K. Kersse, P. Vandenabeele, E. C. Lavelle, and S. J. Martin. 2009.  
553 Suppression of Interleukin-33 Bioactivity through Proteolysis by Apoptotic Caspases.  
554 *Immunity* 31: 84-98.
- 555 12. Beltran, C. J., L. E. Nunez, D. Diaz-Jimenez, N. Farfan, E. Candia, C. Heine, F. Lopez, M.  
556 J. Gonzalez, R. Quera, and M. A. Hermoso. 2010. Characterization of the novel ST2/IL-  
557 33 system in patients with inflammatory bowel disease. *Inflammatory bowel diseases* 16:  
558 1097-1107.
- 559 13. Kobori, A., Y. Yagi, H. Imaeda, H. Ban, S. Bamba, T. Tsujikawa, Y. Saito, Y. Fujiyama,  
560 and A. Andoh. 2010. Interleukin-33 expression is specifically enhanced in inflamed  
561 mucosa of ulcerative colitis. *Journal of gastroenterology* 45: 999-1007.
- 562 14. Sedhom, M. A. K., M. Pichery, J. R. Murdoch, B. Foligne, N. Ortega, S. Normand, K.  
563 Mertz, D. Sanmugalingam, L. Brault, T. Grandjean, E. Lefrancais, P. G. Fallon, V.  
564 Quesniaux, L. Peyrin-Biroulet, G. Cathomas, T. Junt, M. Chamailard, J. P. Girard, and B.  
565 Ryffel. 2013. Neutralisation of the interleukin-33/ST2 pathway ameliorates  
566 experimental colitis through enhancement of mucosal healing in mice. *Gut* 62: 1714-  
567 1723.
- 568 15. Sponheim, J., J. Pollheimer, T. Olsen, J. Balogh, C. Hammarstrom, T. Loos, M.  
569 Kasprzycka, D. R. Sorensen, H. R. Nilsen, A. M. Kuchler, M. H. Vatn, and G. Haraldsen.  
570 2010. Inflammatory Bowel Disease-Associated Interleukin-33 Is Preferentially  
571 Expressed in Ulceration-Associated Myofibroblasts. *American Journal of Pathology* 177:  
572 2804-2815.
- 573 16. He, Z., L. Chen, F. O. Souto, C. Canasto-Chibuque, G. Bongers, M. Deshpande, N.  
574 Harpaz, H. M. Ko, K. Kelley, G. C. Furtado, and S. A. Lira. 2017. Epithelial-derived IL-33  
575 promotes intestinal tumorigenesis in Apc Min/+ mice. *Scientific reports* 7: 5520.

- 576 17. Martin, N. T., and M. U. Martin. 2016. Interleukin 33 is a guardian of barriers and a local  
577 alarmin. *Nat Immunol* 17: 122-131.
- 578 18. Hong, J., S. Bae, H. Jhun, S. Lee, J. Choi, T. Kang, A. Kwak, K. Hong, E. Kim, S. Jo, and  
579 S. Kim. 2011. Identification of constitutively active interleukin 33 (IL-33) splice variant.  
580 *The Journal of biological chemistry* 286: 20078-20086.
- 581 19. Cayrol, C., and J. P. Girard. 2009. The IL-1-like cytokine IL-33 is inactivated after  
582 maturation by caspase-1. *P Natl Acad Sci USA* 106: 9021-9026.
- 583 20. Ali, S., D. O. Nguyen, W. Falk, and M. U. Martin. 2010. Caspase 3 inactivates biologically  
584 active full length interleukin-33 as a classical cytokine but does not prohibit nuclear  
585 translocation. *Biochemical and biophysical research communications* 391: 1512-1516.
- 586 21. Lefrancais, E., A. Duval, E. Mirey, S. Roga, E. Espinosa, C. Cayrol, and J. P. Girard. 2014.  
587 Central domain of IL-33 is cleaved by mast cell proteases for potent activation of group-  
588 2 innate lymphoid cells. *P Natl Acad Sci USA* 111: 15502-15507.
- 589 22. Lefrancais, E., S. Roga, V. Gautier, A. Gonzalez-de-Peredo, B. Monsarrat, J. P. Girard,  
590 and C. Cayrol. 2012. IL-33 is processed into mature bioactive forms by neutrophil  
591 elastase and cathepsin G. *P Natl Acad Sci USA* 109: 1673-1678.
- 592 23. Lefrancais, E., and C. Cayrol. 2012. Mechanisms of IL-33 processing and secretion:  
593 differences and similarities between IL-1 family members. *European cytokine network*  
594 23: 120-127.
- 595 24. Pinto, D., S. Robine, F. Jaisser, F. El Marjou, and D. Louvard. 1999. Regulatory  
596 sequences of the mouse villin gene that efficiently drive transgenic expression in  
597 immature and differentiated epithelial cells of small and large intestines. *Journal of*  
598 *Biological Chemistry* 274: 6476-6482.
- 599 25. Arshad, M. I., S. Patrat-Delon, C. Piquet-Pellorce, A. L'Helgoualc'h, M. Rauch, V. Genet,  
600 C. Lucas-Clerc, C. Bleau, L. Lamontagne, and M. Samson. 2013. Pathogenic mouse  
601 hepatitis virus or poly(I:C) induce IL-33 in hepatocytes in murine models of hepatitis.  
602 *PloS one* 8: e74278.

- 603 26. Untergasser, A., H. Nijveen, X. Rao, T. Bisseling, R. Geurts, and J. A. Leunissen. 2007.  
604 Primer3Plus, an enhanced web interface to Primer3. *Nucleic acids research* 35: W71-74.
- 605 27. Bongers, G., M. E. Pacer, T. H. Geraldino, L. Chen, Z. He, D. Hashimoto, G. C. Furtado,  
606 J. Ochando, K. A. Kelley, J. C. Clemente, M. Merad, H. van Bakel, and S. A. Lira. 2014.  
607 Interplay of host microbiota, genetic perturbations, and inflammation promotes local  
608 development of intestinal neoplasms in mice. *The Journal of experimental medicine* 211:  
609 457-472.
- 610 28. Furtado, G. C., M. E. Pacer, G. Bongers, C. Benezech, Z. He, L. Chen, M. C. Berin, G.  
611 Kollias, J. H. Caamano, and S. A. Lira. 2014. TNFalpha-dependent development of  
612 lymphoid tissue in the absence of RORgammat(+) lymphoid tissue inducer cells.  
613 *Mucosal immunology* 7: 602-614.
- 614 29. Bindea, G., B. Mlecnik, H. Hackl, P. Charoentong, M. Tosolini, A. Kirilovsky, W. H.  
615 Fridman, F. Pages, Z. Trajanoski, and J. Galon. 2009. ClueGO: a Cytoscape plug-in to  
616 decipher functionally grouped gene ontology and pathway annotation networks.  
617 *Bioinformatics* 25: 1091-1093.
- 618 30. Shannon, P., A. Markiel, O. Ozier, N. S. Baliga, J. T. Wang, D. Ramage, N. Amin, B.  
619 Schwikowski, and T. Ideker. 2003. Cytoscape: a software environment for integrated  
620 models of biomolecular interaction networks. *Genome research* 13: 2498-2504.
- 621 31. Trapnell, C., L. Pachter, and S. L. Salzberg. 2009. TopHat: discovering splice junctions  
622 with RNA-Seq. *Bioinformatics* 25: 1105-1111.
- 623 32. Anders, S., P. T. Pyl, and W. Huber. 2015. HTSeq--a Python framework to work with  
624 high-throughput sequencing data. *Bioinformatics* 31: 166-169.
- 625 33. McCarthy, D. J., Y. Chen, and G. K. Smyth. 2012. Differential expression analysis of  
626 multifactor RNA-Seq experiments with respect to biological variation. *Nucleic acids  
627 research* 40: 4288-4297.

- 628 34. Robinson, M. D., D. J. McCarthy, and G. K. Smyth. 2010. edgeR: a Bioconductor  
629 package for differential expression analysis of digital gene expression data.  
630 *Bioinformatics* 26: 139-140.
- 631 35. Wellman, A. S., M. R. Metukuri, N. Kazgan, X. J. Xu, Q. Xu, N. S. X. Ren, A. Czopik, M. T.  
632 Shanahan, A. Kang, W. Chen, M. A. Azcarate-Peril, A. S. Gulati, D. C. Fargo, L.  
633 Guarente, and X. L. Li. 2017. Intestinal Epithelial Sirtuin 1 Regulates Intestinal  
634 Inflammation During Aging in Mice by Altering the Intestinal Microbiota.  
635 *Gastroenterology* 153: 772-786.
- 636 36. Peine, M., R. M. Marek, and M. Lohning. 2016. IL-33 in T Cell Differentiation, Function,  
637 and Immune Homeostasis. *Trends in immunology* 37: 321-333.
- 638 37. Pesce, J. T., T. R. Ramalingam, M. S. Wilson, M. M. Mentink-Kane, R. W. Thompson, A.  
639 W. Cheever, J. F. Urban, Jr., and T. A. Wynn. 2009. Retnla (relmalpha/fizz1) suppresses  
640 helminth-induced Th2-type immunity. *PLoS pathogens* 5: e1000393.
- 641 38. Pastorelli, L., C. De Salvo, M. Vecchi, and T. T. Pizarro. 2013. The role of IL-33 in gut  
642 mucosal inflammation. *Mediators Inflamm* 2013: 608187.
- 643 39. Nunes, T., C. Bernardazzi, and H. S. de Souza. 2014. Interleukin-33 and inflammatory  
644 bowel diseases: lessons from human studies. *Mediators Inflamm* 2014: 423957.
- 645 40. Schiering, C., T. Krausgruber, A. Chomka, A. Frohlich, K. Adelman, E. A. Wohlfert, J.  
646 Pott, T. Griseri, J. Bollrath, A. N. Hegazy, O. J. Harrison, B. M. J. Owens, M. Lohning, Y.  
647 Belkaid, P. G. Fallon, and F. Powrie. 2014. The alarmin IL-33 promotes regulatory T-cell  
648 function in the intestine. *Nature* 513: 564-568.
- 649 41. Bamias, G., and F. Cominelli. 2015. Role of type 2 immunity in intestinal inflammation.  
650 *Current opinion in gastroenterology* 31: 471-476.
- 651 42. Moreels, T. G., and P. A. Pelckmans. 2005. Gastrointestinal parasites: potential therapy  
652 for refractory inflammatory bowel diseases. *Inflammatory bowel diseases* 11: 178-184.

- 653 43. Taghipour, N., H. A. Aghdaei, A. Haghghi, N. Mossafa, S. J. Tabaei, and M. Rostami-  
654 Nejad. 2014. Potential treatment of inflammatory bowel disease: a review of helminths  
655 therapy. *Gastroenterology and hepatology from bed to bench* 7: 9-16.
- 656 44. Pascual-Reguant, A., J. Bayat Sarmadi, C. Baumann, R. Noster, D. Cirera-Salinas, C.  
657 Curato, P. Pelczar, S. Huber, C. E. Zielinski, M. Lohning, A. E. Hauser, and E. Esplugues.  
658 2017. TH17 cells express ST2 and are controlled by the alarmin IL-33 in the small  
659 intestine. *Mucosal immunology* 10: 1431-1442.
- 660 45. Seo, D. H., X. Che, M. S. Kwak, S. Kim, J. H. Kim, H. W. Ma, D. H. Kim, T. I. Kim, W. H.  
661 Kim, S. W. Kim, and J. H. Cheon. 2017. Interleukin-33 regulates intestinal inflammation  
662 by modulating macrophages in inflammatory bowel disease. *Scientific reports* 7: 851.
- 663 46. Tu, L., J. Chen, D. Xu, Z. Xie, B. Yu, Y. Tao, G. Shi, and L. Duan. 2017. IL-33-induced  
664 alternatively activated macrophage attenuates the development of TNBS-induced  
665 colitis. *Oncotarget* 8: 27704-27714.
- 666 47. Hodzic, Z., E. M. Schill, A. M. Bolock, and M. Good. 2017. IL-33 and the intestine: The  
667 good, the bad, and the inflammatory. *Cytokine* 100: 1-10.
- 668 48. Roussel, L., M. Erard, C. Cayrol, and J. P. Girard. 2008. Molecular mimicry between IL-33  
669 and KSHV for attachment to chromatin through the H2A-H2B acidic pocket. *Embo Rep*  
670 9: 1006-1012.
- 671 49. Carriere, V., L. Roussel, N. Ortega, D. A. Lacorre, L. Americh, L. Aguilar, G. Bouche, and  
672 J. P. Girard. 2007. IL-33, the IL-1-like cytokine ligand for ST2 receptor, is a chromatin-  
673 associated nuclear factor in vivo. *P Natl Acad Sci USA* 104: 282-287.
- 674 50. Shao, D., F. Perros, G. Caramori, C. Meng, P. Dormuller, P. C. Chou, C. Church, A. Papi,  
675 P. Casolari, D. Welsh, A. Peacock, M. Humbert, I. M. Adcock, and S. J. Wort. 2014.  
676 Nuclear IL-33 regulates soluble ST2 receptor and IL-6 expression in primary human  
677 arterial endothelial cells and is decreased in idiopathic pulmonary arterial hypertension.  
678 *Biochemical and biophysical research communications* 451: 8-14.



- 679 51. Ali, S., A. Mohs, M. Thomas, J. Klare, R. Ross, M. L. Schmitz, and M. U. Martin. 2011.  
680 The dual function cytokine IL-33 interacts with the transcription factor NF-kappaB to  
681 dampen NF-kappaB-stimulated gene transcription. *Journal of immunology* 187: 1609-  
682 1616.
- 683 52. Choi, Y. S., J. A. Park, J. Kim, S. S. Rho, H. Park, Y. M. Kim, and Y. G. Kwon. 2012.  
684 Nuclear IL-33 is a transcriptional regulator of NF-kappaB p65 and induces endothelial  
685 cell activation. *Biochemical and biophysical research communications* 421: 305-311.
- 686 53. Gautier, V., C. Cayrol, D. Farache, S. Roga, B. Monsarrat, O. Burlet-Schiltz, A. Gonzalez  
687 de Peredo, and J. P. Girard. 2016. Extracellular IL-33 cytokine, but not endogenous  
688 nuclear IL-33, regulates protein expression in endothelial cells. *Scientific reports* 6:  
689 34255.
- 690 54. Bessa, J., C. A. Meyer, M. C. de Vera Mudry, S. Schlicht, S. H. Smith, A. Iglesias, and J.  
691 Cote-Sierra. 2014. Altered subcellular localization of IL-33 leads to non-resolving lethal  
692 inflammation. *Journal of autoimmunity* 55: 33-41.  
693

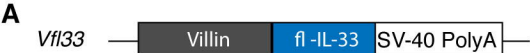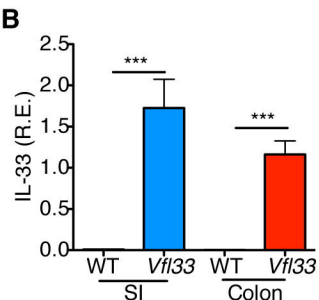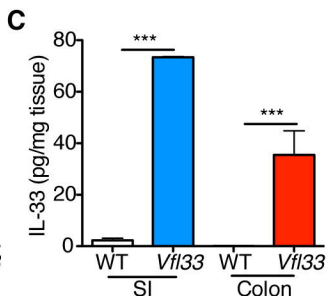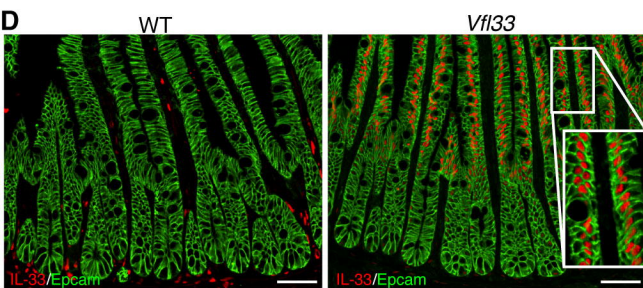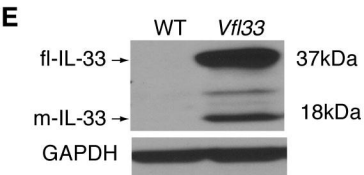

**A**

WT

*Vfl33*

SI

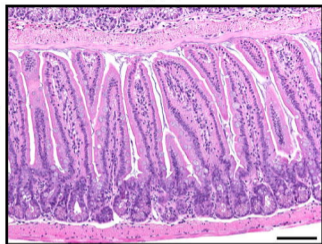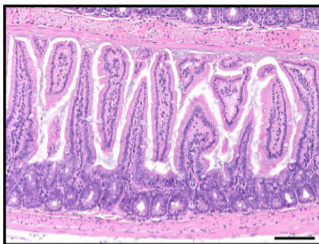

LI

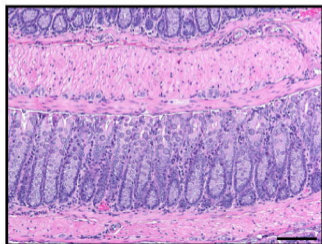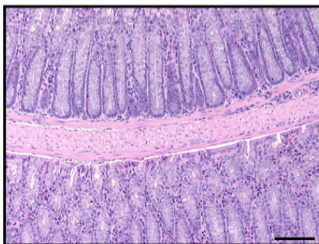**B**

SI

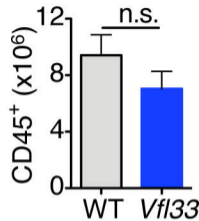

LI

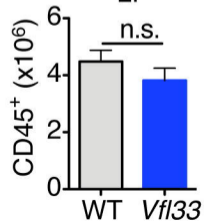

**A**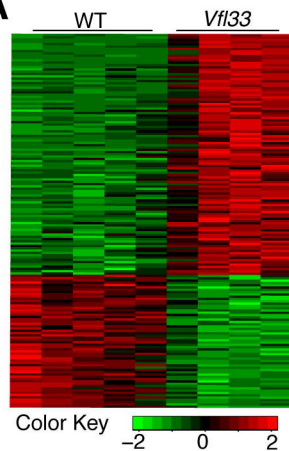**B**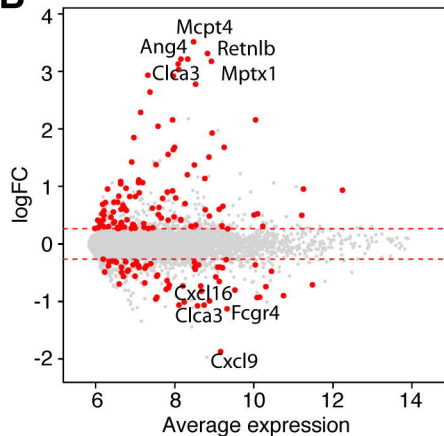**C**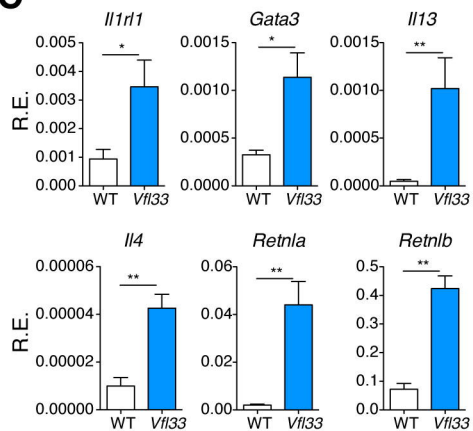**D**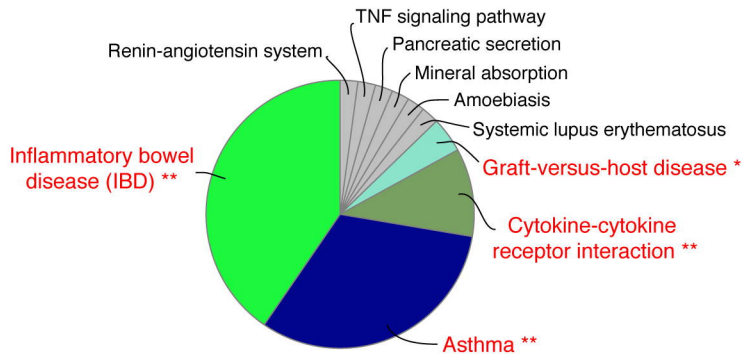**E**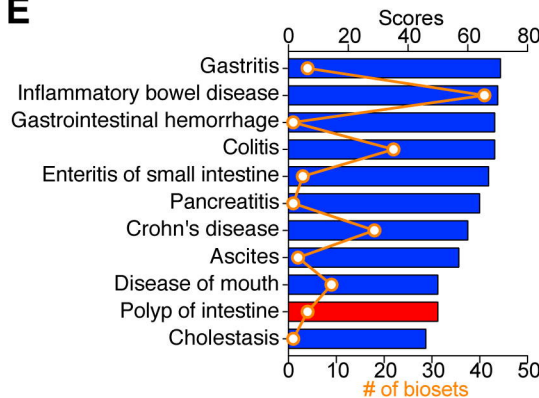

**A**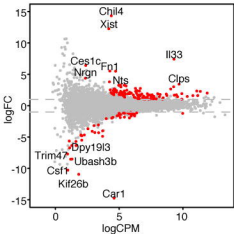**B**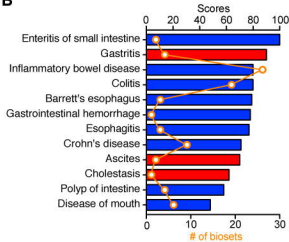

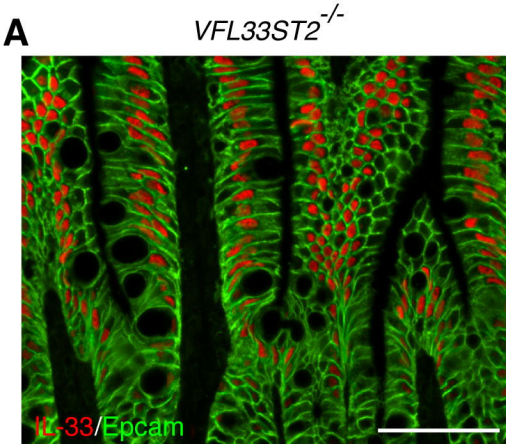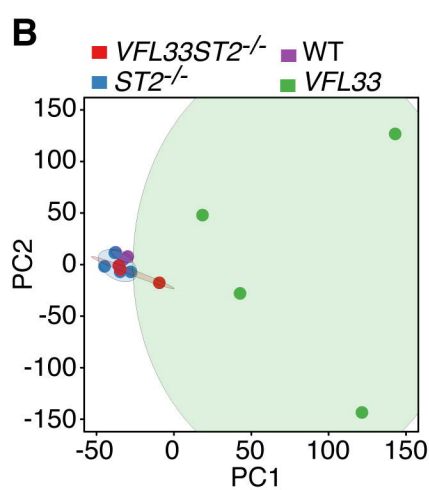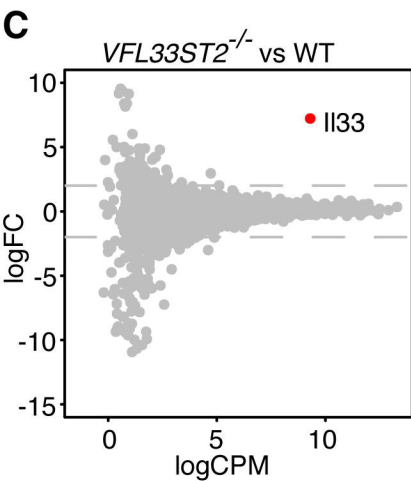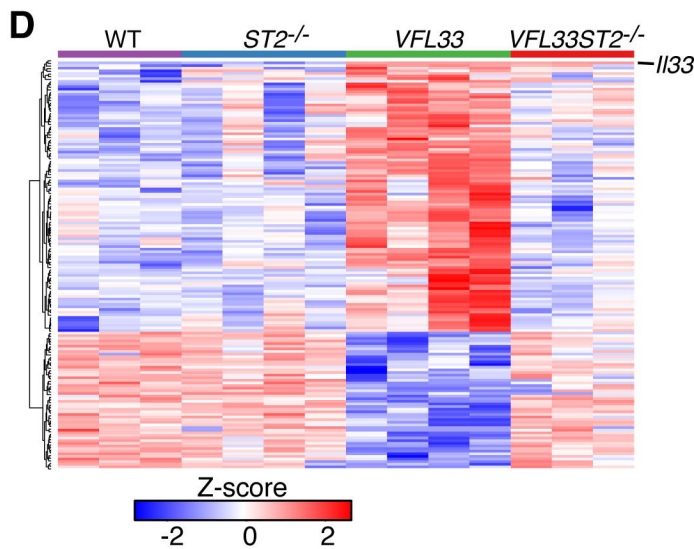

Source: http://biorxiv.org/content/10.1101/291039v1.full.pdf
